# Supplementary material for: Analysis of measurement differences and causes of C, N, and P in river flooding areas—taking the Hailar River in China as an example
Source: PeerJ journal article supplement (doi:10.7717/peerj.17745), 2024-07-12
Supplement: Raw_data.zip [file Raw_data.zip]

## Sheet: AHN
point1		concave			point2	concave				point3	concave				point4	concave
133.792	0.990099	224.591	0.954738		105.66	0.95339	184.906	1.02401		74.2925	1.05634	105.66	1.05634		87.5	0.956091	97.4057	0.956091
158.619	1.94484	221.36	2.01556		123.821	1.9774	146.934	2.01271		62.7358	2.07746	89.1509	2.04225		99.0566	1.983	87.5	2.01841
117.413	2.9703	256.095	3.00566		97.4057	2.9661	161.792	2.9661		105.66	3.09859	92.4528	3.02817		97.4057	2.9745	74.2925	2.9745
105.924	3.99576	241.304	4.03112		123.821	4.02542	201.415	4.09605		94.1038	4.08451	108.962	4.01408		90.8019	4.00142	99.0566	3.96601
148.912	4.9505	271.084	4.98586		110.613	5.01412	135.377	5.04944		82.5472	5.07042	95.7547	5.07042		84.1981	5.02833	99.0566	4.95751
122.564	5.97595	248.038	6.01132		146.934	5.86158	95.7547	6.00282		84.1981	6.05634	77.5943	6.09155		64.3868	6.01983	84.1981	5.98442
132.538	7.00141	279.469	6.96605		128.774	7.02684	112.264	6.95621		102.358	7.00704	72.6415	7.04225		67.6887	6.97592	89.1509	6.97592
160.667	7.95615	307.603	7.99151		105.66	7.9096	123.821	7.98023		75.9434	8.02817	94.1038	7.99296		70.9906	7.96742	90.8019	7.96742
149.178	8.98161	319.223	8.94625		100.708	9.03955	196.462	8.96893		112.264	9.01408	95.7547	9.0493		77.5943	8.99433	84.1981	8.95892
107.972	10.0071	332.5	10.0071		128.774	9.99294	161.792	9.99294		89.1509	10	97.4057	10.0352		95.7547	9.98584	80.8962	9.98584
142.707	10.9972	287.99	10.9972		151.887	11.0169	105.66	11.0169		107.311	11.0211	89.1509	10.9507		97.4057	11.0127	100.708	11.0127
144.424	11.9873	241.829	11.9873		145.283	11.9703	100.708	12.0056		85.8491	12.007	92.4528	12.0423		90.8019	12.0042	127.123	12.0042
109.819	12.9774	276.565	12.9774		117.217	13.0297	138.679	12.959		113.915	12.993	94.1038	12.993		84.1981	12.9958	113.915	12.9958
128.045	13.9675				135.377	14.0184	118.868	14.0184		128.774	13.9789	75.9434	14.0141		75.9434	14.0581	105.66	14.0227
180.943	14.9929				107.311	14.9718	89.1509	15.0424		118.868	15	79.2453	15		92.4528	15.0142	94.1038	15.0496
159.546	15.983				100.708	15.9958	97.4057	15.9605		123.821	15.9859	84.1981	16.0211		84.1981	16.0057	120.519	15.9703
134.847	16.9731				100.708	17.0198	80.8962	17.0551		137.028	17.007	94.1038	17.007		90.8019	17.0326	132.075	17.0326
181.141	17.9986						77.5943	17.9732				70.9906	17.9577		99.0566	18.0241	108.962	18.0241
116.82	18.9887						85.8491	19.0325				84.1981	18.9789		90.8019	19.0156	127.123	18.9802
179.621	19.9788						67.6887	20.0212				99.0566	19.9648		70.9906	20.0071	99.0566	20.0071
156.573	20.9689											99.0566	20.9859				137.028	20.9632
141.527	10.9803	269.819	6.99054	#DIV/0!	119.451	8.98763	124.151	10.5067	#DIV/0!	99.9306	9.02858	90.0943	11.0161	#DIV/0!	85.6014	10.5028	102.516	10.9908

## Sheet: TC
point1		concave			point2	concave				point3	concave				point4	concave
18.3099	0.944257	80.2817	0.957647		27.6995	1.02943	32.3944	0.995919		11.3208	1.01412	30.1887	1.00749		3.73832	1.05468	27.5701	1.02794
19.7183	1.96489	80.7512	1.9434		24.4131	1.94248	30.9859	2.01511		13.2075	2.03171	30.6604	2.02559		2.80374	2.0375	32.7103	2.048
23.0047	2.94965	76.0563	2.96618		25.3521	2.99766	31.9249	3.03514		10.8491	2.98058	33.4906	3.04285		3.73832	3.02098	29.9065	3.03016
20.6573	3.9716	79.3427	3.91572		26.2911	3.98252	33.8028	4.02032		11.7925	3.9985	33.4906	4.026		3.27103	4.00396	30.8411	4.01364
20.1878	4.95768	76.0563	4.9028		27.23	5.00254	31.9249	5.00419		12.7358	5.01643	32.0755	4.93941		4.6729	4.9876	25.2336	5.02993
19.7183	5.97897	76.9953	5.9588		28.169	6.02256	31.4554	6.05888		12.7358	6.0698	25.9434	5.99494		3.73832	6.04064	28.0374	6.04917
19.7183	7.0001	75.1174	6.94538		26.2911	7.00643	32.3944	7.00858		12.7358	6.98272	25.4717	7.01336		4.6729	6.989	25.2336	7.03133
23.4742	7.98469	78.4038	7.93014		24.4131	8.02546	30.5164	8.02761		11.7925	8.00131	25.4717	8.03162		3.27103	8.00677	31.7757	8.01678
20.6573	9.00681	76.5258	8.91672		27.23	9.04614	32.8638	9.01296		12.2642	8.98429	44.3396	8.97303		4.20561	9.06047	34.1121	9.03585
23.4742	9.99173	79.8122	9.93669		27.23	10.0658	30.0469	9.9965		14.1509	10.037	45.283	9.99096		8.41121	10.0802	29.9065	10.0175
26.7606	10.9765	80.7512	10.9575		24.4131	10.9439	32.8638	11.0172		11.7925	11.021	48.1132	11.0082		7.47664	11.0279	28.0374	11.0702
20.6573	11.9646	76.5258	11.9449		25.8216	11.9992	30.5164	12.0009		12.7358	12.0038	46.2264	12.0271		7.00935	12.046	33.1776	12.0201
18.7793	12.9511	77.4648	12.9305		25.3521	13.0188	33.8028	13.0217		11.3208	12.9874	46.6981	13.0101		9.81308	13.0301	28.0374	13.0365
21.5962	14.0065				26.2911	13.9685	33.3333	14.0413		2.83019	14.0087	49.5283	14.0274		9.81308	14.0484	28.972	13.9849
23.0047	14.9919				24.8826	15.0228	30.0469	14.9543		4.24528	14.9913	48.1132	14.9408		8.8785	15.0663	23.3645	15.0363
24.8826	16.0124				27.6995	16.0083	30.9859	16.0447		5.18868	16.0092	47.1698	15.9594		9.34579	16.0145	30.8411	16.0221
20.6573	16.9646				26.2911	16.9924	32.3944	16.9945		3.30189	17.0282	46.2264	16.978		8.8785	16.9624	25.2336	17.0032
18.7793	17.9863						30.5164	17.9784		2.83019	18.0466				10.7477	18.0164	26.1682	18.0569
23.4742	18.9706						30.9859	19.0686		3.30189	18.9593				7.94393	19.0337	28.0374	19.0056
22.0657	19.9922									3.30189	19.9425				9.34579	19.9822	27.1028	19.9884
18.7793	20.9793									3.30189	20.9959						24.7664	21.0059
21.3503	10.9784	78.0065	6.93895	#DIV/0!	26.1806	9.00441	31.7766	10.0156	#DIV/0!	8.9398	11.0053	38.7347	8.99978	#DIV/0!	6.58879	10.5255	28.5269	11.0253

## Sheet: AP
point1	concave				point2	concave				point3	concave				point4			concave
1.90304	0.963386	1.4291	0.962543		15.2685	1.00431	12.3299	0.973978		7.45283	1.04306	14.3396	1.05529		5.61905	1.02983	12.6667	1.06534
1.43692	1.99385	2.10044	1.99503		10.9154	1.93666	8.83042	1.97593		8.01887	2.0739	8.30189	2.03889		7.90476	2.05966	3.61905	2.09517
1.53926	2.98977	1.63405	2.98993		10.7339	3.00384	9.78582	2.96997		8.01887	2.99719	10.3774	3.03689		12.9524	3.01847	6.7619	2.98295
1.45229	4.02091	1.35697	3.94961		9.60407	4.00158	11.5946	3.99804		6.60377	4.02451	2.83019	4.01781		16.9524	4.0483	6.95238	4.01278
1.55409	4.9457	0.890845	4.98008		13.5926	4.99022	10.2751	4.99612		5.9434	4.94663	1.13208	5.04462		10.2857	4.97159	8.19048	4.97159
1.46685	5.94127	1.94079	5.94212		12.652	5.95207	9.61917	5.99302		6.88679	5.97814	1.69811	6.03995		9.71429	6.00142	5.42857	6.00142
1.47467	6.97258	1.66425	6.97292		10.203	7.98345	7.73047	6.92099		7.16981	7.00847	1.79245	7.03443		4.19048	7.03125	6.7619	7.03125
1.57701	7.9685	3.66235	7.9722		9.64182	8.98018	8.49685	7.98648		5.75472	8.03579	1.41509	8.02808		5.14286	7.99006	16.0952	7.99006
1.39499	8.96391	2.24808	8.96542		12.4927	9.93528	12.201	8.97563		6.41509	8.99577	1.03774	8.98622		3.90476	9.01989	8	9.01989
8.796	9.9728	1.78142	9.92476		10.6993	10.9342	18.2751	9.99612		5.9434	10.0248	5.18868	9.98791		9.33333	10.0142	2	10.0497
8.61425	11.0038	2.9267	10.9581		11.3703	11.9287	17.6192	10.993		4.43396	11.0164	2.26415	10.977		6.95238	11.0795	2	10.973
8.71659	11.9997	1.60722	11.9515		12.9895	12.9572	16.2047	11.9557		7.07547	11.9799	2.73585	11.9722		2.7619	12.0028	4.57143	11.9673
8.34499	12.9948	1.99419	12.9835		14.1345	13.9509	11.7573	12.9593		8.20755	13.0472	3.58491	12.968		3.2381	13.0327	6.09524	13.0327
		3.23371	13.9458		11.8672	14.9506	13.0921	13.9883		8.01887	13.9702	6.22642	14.0736		4.95238	14.027	4.19048	14.098
		3.05196	14.9768		16.6143	15.9735	15.7534	14.9437		7.54717	14.9992	7.26415	15.0342		5.04762	15.0213	13.0476	15.0923
		3.81781	15.9739		15.7685	16.9351	14.5293	16.0127		8.86792	15.9959	4.90566	16.0243		2.7619	15.9801	11.3333	16.0866
		3.63579	16.9693				15.769	17.0063		13.8679	17.0346	6.50943	17.0215		4.85714	17.0099	10.5714	17.0099
		5.7284	17.9332				17.0083	17.9287		11.4151	18.06				11.3333	18.0043	7.90476	18.0043
		4.88313	18.963				19.386	18.9913		12.6415	18.9145				12.7619	18.9986	9.33333	18.9986
		5.27011	19.995				16.9288	19.9558		10.566	20.0117				18.4762	19.9574	6.57143	20.0284
		7.93145	20.9599							10.9434	20.9711				5.90476	21.0227
3.71315	6.97931	2.98994	10.965	#DIV/0!	12.4092	9.08861	13.3593	10.4761	#DIV/0!	8.18059	11.0061	4.80022	9.02005	#DIV/0!	7.85941	11.0153	7.60476	10.5256
